# Supplementary material for: Recombinant Rod Domain of Vimentin Reduces SARS-CoV-2 Viral Replication by Blocking Spike Protein–ACE2 Interactions
Source: MDPI journal article supplement (doi:10.3390/ijms25052477), 2024-02-20
Supplement: s1 [file s1]

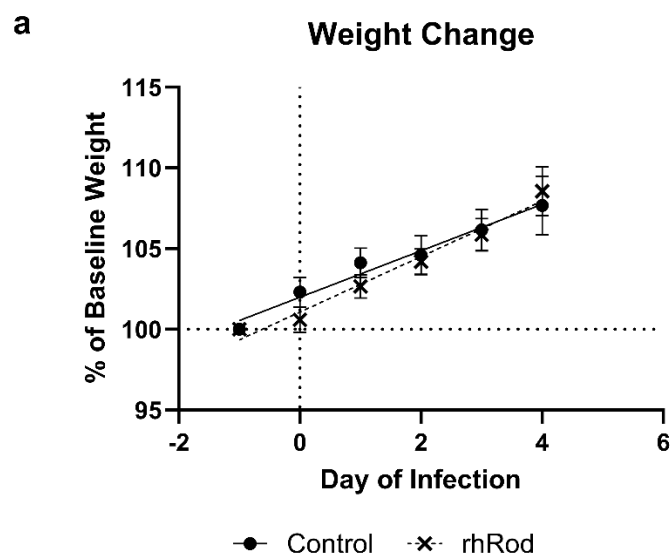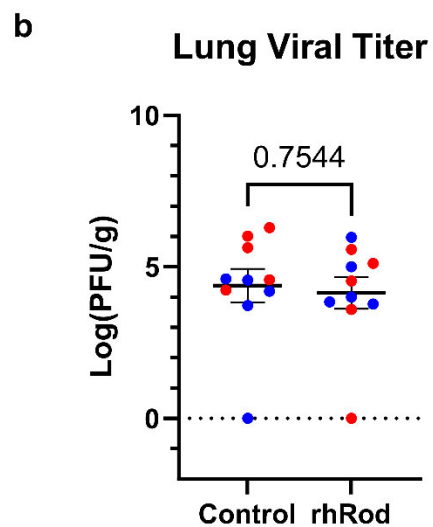

**Supplemental Figure S1.** (a) Weight change of SARS-CoV-2-infected mice was similar between groups. (b) Log<sub>10</sub>-transformed viral titers from homogenized lung tissue was similar between groups. Red and blue circles represent female and male animals, respectively.
